# Supplementary material
Source: publisher site journal article supplement (https://www.degruyterbrill.com/publication/isbn/9783110353693/downloadAsset/9783110353693_Inhaltsverzeichnis.pdf)
Supplement: Supplementary file 1 [file 9783110353693_Inhaltsverzeichnis.pdf]

## Inhaltsverzeichnis

### Einleitung

*Alexander Lasch & Alexander Ziem*

Konstruktionen und Konstruktionsnetzwerke – zur Konzeption des Bandes.....3

*Alexander Ziem*

Konstruktionsgrammatische Konzepte eines Konstruktikons.....15

### 1. Konstruktionsnetzwerke und Aspekte einer „Konstruktionsgrammatik des Deutschen“

*Hans C. Boas*

Zur Architektur einer konstruktionsbasierten Grammatik des Deutschen.....37

*Alexander Lasch*

*Das Fenster wirkt geschlossen.* Überlegungen zu nonagentiven Konstruktionen des Deutschen aus konstruktionsgrammatischer Perspektive .....65

*Jouni Rostila*

Inventarisierung als Grammatikalisierung: produktive Präpositionalobjekte und andere grammatikalisierte Linking-Muster.....97

*Jörg Bücker*

Konstruktionen und Konstruktionscluster : das Beispiel der Zirkumposition von XP *her* im gesprochenen Deutsch ..... 117

### 2. Konstruktionsnetzwerke in Morphologie, Syntax und Spracherwerb: synchrone und diachrone Perspektiven

*Sascha Michel*

Konstruktionsgrammatik und Wortbildung: Theoretische Reflexionen und praktische Anwendungen am Beispiel der Verschmelzung von Konstruktionen ..... 139

*Sabine De Knop*

Deutsche Konstruktionen mit komplexen *bis*-Präpositionalgruppen ..... 157

*Elke Diedrichsen*

Zur ‚Inventarisierung‘ von idiomatischen und Argumentstruktur-Konstruktionen im Deutschen..... 175

*Regine Froschauer*

Die Grammatikalisierung der beiden Vollverben *haben* und *eigen* zu Auxiliaren bei der Umschreibung von Vergangenheitsstempora im Althochdeutschen ..... 195

*Michael Rödel*

Mehr als die Summe der einzelnen Teile: Konstruktionen und ihre Einheiten aus diachroner und synchroner Perspektive..... 207

|                                                                          |     |
|--------------------------------------------------------------------------|-----|
| <i>Sinja Ballmer</i>                                                     |     |
| Form-Funktions-Mapping dank Konstruktionen im Input?.....                | 225 |
| <i>Kerstin Fischer</i>                                                   |     |
| „Konspirative“ Relationen zwischen Konstruktionen beim Sprachlernen..... | 243 |

### **3. Das Konstruktikon im Fokus verwandter und konkurrierender Theorieansätze**

|                                                                                                                                                                                            |     |
|--------------------------------------------------------------------------------------------------------------------------------------------------------------------------------------------|-----|
| <i>Alexander Ziem</i>                                                                                                                                                                      |     |
| Von der Kasusgrammatik zum FrameNet: Frames, Konstruktionen und die Idee eines Konstruktikons .....                                                                                        | 263 |
| <i>Frank Richter &amp; Manfred Sailer</i>                                                                                                                                                  |     |
| Idiome mit phraseologisierten Teilsätzen: eine Fallstudie zur Formalisierung von Konstruktionen im Rahmen der HPSG.....                                                                    | 291 |
| <i>Rainer Osswald</i>                                                                                                                                                                      |     |
| Konstruktion versus Projektion: Argumentrealisierung bei Kognitionsverben des Deutschen und Englischen .....                                                                               | 313 |
| <i>Monika Budde</i>                                                                                                                                                                        |     |
| Konstruktionen in der Integrativen Linguistik am Beispiel der Direktional+mit-Konstruktionen: Rein-syntaktische Pendants zu den lexikalisch verankerten projizierenden Konstruktionen..... | 329 |
| <i>Jan Georg Schneider</i>                                                                                                                                                                 |     |
| In welchem Sinne sind Konstruktionen Zeichen? Zum Begriff der Konstruktion aus semiologischer und medialitätstheoretischer Perspektive.....                                                | 357 |
| Autorinnen und Autoren.....                                                                                                                                                                | 375 |
